# Supplementary material for: Effectiveness of an Education Intervention Among Cardiac Rehabilitation Patients in Canada: A Multi-Site Study
Source: PubMed Central journal article supplement — CJC Open. 2020 Mar 4;2(4):214–21. doi: 10.1016/j.cjco.2020.02.008 (PMC7365818; doi:10.1016/j.cjco.2020.02.008), 2020-03-04
Supplement: mmc1.pdf [file mmc1.pdf]

Supplemental Table S1: Description of the education intervention (schedule and content) in each site

## Site 1: Education Program Schedule with the Cardiac College at TRI-UHN - Toronto

Education at TRI-UHN was delivered as followed: 21 education sections (once per week) with 30 minutes of duration per session. The content of these sessions followed the 5 pillars of Cardiac College (treating heart disease, getting active, healthy eating, emotional wellbeing, and taking control). A multidisciplinary team of healthcare providers delivered the education through lectures and using the patient guide in English.

| Week | Education Topic                           | Guide Section & Chapter                                                                                                         |
|------|-------------------------------------------|---------------------------------------------------------------------------------------------------------------------------------|
| 1    | Orientation to Your Cardiac Rehab Program | Section #1<br>Chapter #1<br>Page 1                                                                                              |
| 2    | Safe Exercise (includes angina education) | Section #1<br>Chapter # 2<br>Page 6<br><br>Angina:<br>Chapter #4<br>Page 23<br><br>Irregular Heartbeats<br>Chapter #5<br>Page28 |

|    |                                                                                                                                                                 |                                                                               |
|----|-----------------------------------------------------------------------------------------------------------------------------------------------------------------|-------------------------------------------------------------------------------|
| 3  | <b>Aerobic Exercise</b>                                                                                                                                         | Section #1<br>Chapter #2<br>Page 17                                           |
| 4  | <b>Exercise and Cold Weather</b> <i>(this can be moved later to an open spot if the time of year is not appropriate for the topic or change to hot weather)</i> | Section #1<br>Chapter #6 (page 33 for cold) & Chapter #7<br>(page 41 for hot) |
| 5  | <b>Your Heart and Heart Disease</b>                                                                                                                             | Section #1<br>Chapter #8<br>Page 50                                           |
| 6  | <b>Cardiac Medicines</b>                                                                                                                                        | Section #1<br>Chapter #9<br>Page 63                                           |
| 7  | <b>Controlling Your Risk Factors</b>                                                                                                                            | Section #2<br>Chapter #10<br>Page 72                                          |
| 8  | <b>Goal Setting &amp; Action Planning</b>                                                                                                                       | Section #2<br>Chapter #11<br>Page 79                                          |
| 9  | <b>Resistance Training Part 1 - benefits and safety</b>                                                                                                         | Section #2<br>Chapter #12<br>Page 92                                          |
| 10 | <b>Resistance Training Part 2</b>                                                                                                                               | Section #2<br>Chapter #12<br>Page 92                                          |
| 11 | <b>Nutrition – Fats, Cholesterol and your Diet<br/>+ Resistance Training Part 3</b>                                                                             | Section #2<br>Chapter #13<br>Page 100                                         |
| 12 | <b>Nutrition – Benefits of Fibre and Plant Food</b>                                                                                                             | Section #2<br>Chapter #14<br>Page 112                                         |
| 13 | <b>Your Psychosocial Risks – Part 1</b>                                                                                                                         | Section #2<br>Chapter #17<br>Page 134                                         |

|    |                                                                                        |                                                                               |
|----|----------------------------------------------------------------------------------------|-------------------------------------------------------------------------------|
| 14 | <b>No education</b>                                                                    | -                                                                             |
| 15 | <b>No education</b>                                                                    | -                                                                             |
| 16 | <b>Your Psychosocial Risks – Part 2</b>                                                | Section #2<br>Chapter #17<br>Page 134                                         |
| 17 | <b>Nutrition – Reading Food Labels</b><br>Note – there will be no exercise on this day | Section #2<br>Chapter # 15<br>Page 118                                        |
| 18 | <b>Nutrition – Sodium &amp; Blood Pressure</b>                                         | Section #2<br>Chapter #16<br>Page 126                                         |
| 19 | <b>How Much Physical Activity is Good For You?</b>                                     | Section #3<br>Chapter #19<br>Page 151                                         |
| 20 | <b>Progress Your Exercise Program</b>                                                  | Section #3<br>Chapter #20<br>Page 156                                         |
| 21 | <b>Exercise and Weather</b> ( <i>hot or cold depending on season</i> )                 | Section #1<br>Chapter #6 (page 33 for cold) & Chapter #7<br>(page 41 for hot) |
| 22 | <b>Relapse Planning</b>                                                                | Section #3<br>Chapter #21<br>Page 164                                         |
| 23 | <b>Graduation</b>                                                                      | Section #3<br>Chapter 22<br>Page 168                                          |
| 24 | <b>Final class</b>                                                                     | -                                                                             |

## Site 2: Education Program Schedule with the Cardiac College at Cardiac Wellness Program - Moncton

Education at the Cardiac Wellness Program was delivered as follows: 7 education sections with 2 hours of duration per session. The content of these sessions followed the 5 pillars of Cardiac College (treating heart disease, getting active, healthy eating, emotional wellbeing, and taking control). A multidisciplinary team of healthcare providers delivered the education through lectures and using the patient guide in French and English.

| Education Week    | Education Topic                                  | Guide Section & Chapter                                                                                                         | Comments                                                                                                                                                                                                                                                                                                                                                                                                                                                                                                                                                                                                                                        |
|-------------------|--------------------------------------------------|---------------------------------------------------------------------------------------------------------------------------------|-------------------------------------------------------------------------------------------------------------------------------------------------------------------------------------------------------------------------------------------------------------------------------------------------------------------------------------------------------------------------------------------------------------------------------------------------------------------------------------------------------------------------------------------------------------------------------------------------------------------------------------------------|
| Pre-CR            | <b>Orientation to Your Cardiac Rehab Program</b> | Section #1<br>Chapter #1<br>Page 1                                                                                              | Information sessions before patient start the program (3 weeks after referral). We go over why CR is important, the multidisciplinary team that will be working with them and the exercise program as well as education session outlines.                                                                                                                                                                                                                                                                                                                                                                                                       |
| Intake assessment | <b>Safe Exercise</b> (includes angina education) | Section #1<br>Chapter # 2<br>Page 6<br><br>Angina:<br>Chapter #4<br>Page 23<br><br>Irregular Heartbeats<br>Chapter #5<br>Page28 | Taking the pulse is taught during intake assessment by the nurse. The nurse talks to them about stopping exercise whenever they feel angina, palpitations, extreme fatigue, hypoglycemia or if anything is feeling off that day. During patient's first exercise session (one on one with kinesiologist), we go over importance of a warm up and cool down. We show them how to set up the machines in order for the exercise to be safe, we repeat when they should put a stop to their exercise session (see reasons why above given by the nurse). For the first 2 weeks, we revise with them how to fill out their exercise sheets (diary). |
| 1                 | <b>Your Heart and Heart Disease</b>              | Section #1<br>Chapter #8<br>Page 50                                                                                             | Because our education classes alternate between English and French, patient's don't end up doing this class all on the same week.                                                                                                                                                                                                                                                                                                                                                                                                                                                                                                               |
|                   | <b>Controlling Your Risk Factors</b>             | Section #2<br>Chapter #10<br>Page 72                                                                                            | Because our education classes alternate between English and French, patient's don't end up doing this class all on the same week.                                                                                                                                                                                                                                                                                                                                                                                                                                                                                                               |

|       |                                                                                                                                                                 |                                                                            |                                                                                                                                                                                                                                                                                |
|-------|-----------------------------------------------------------------------------------------------------------------------------------------------------------------|----------------------------------------------------------------------------|--------------------------------------------------------------------------------------------------------------------------------------------------------------------------------------------------------------------------------------------------------------------------------|
| 2     | <b>Nutrition – Fats, Cholesterol and your Diet</b>                                                                                                              | Section #2<br>Chapter #13<br>Page 100                                      | In addition to having a one on one meeting with our dietician, patients attend a nutrition education session which is held week 2 of the education sessions.                                                                                                                   |
|       | <b>Nutrition – Benefits of Fibre and Plant Food</b>                                                                                                             | Section #2<br>Chapter #14<br>Page 112                                      |                                                                                                                                                                                                                                                                                |
| 2 & 6 | <b>Nutrition – Sodium &amp; Blood Pressure</b>                                                                                                                  | Section #2<br>Chapter #16<br>Page 126                                      | Week 2 patients attend a nutrition session and week 6 is a session on blood pressure where the effect of sodium is discussed.                                                                                                                                                  |
| 3     | <b>Aerobic Exercise</b>                                                                                                                                         | Section #1<br>Chapter #2<br>Page 17                                        | Because our education classes alternate between English and French, patient's don't end up doing this class all on the same week.                                                                                                                                              |
|       | <b>Exercise and Cold Weather</b> <i>(this can be moved later to an open spot if the time of year is not appropriate for the topic or change to hot weather)</i> | Section #1<br>Chapter #6 (page 33 for cold) & Chapter #7 (page 41 for hot) | This can also be discussed during a patient's first exercise session, especially if they start the program during the winter months.                                                                                                                                           |
|       | <b>How Much Physical Activity is Good For You?</b>                                                                                                              | Section #3<br>Chapter #19<br>Page 151                                      | During a patients first one on one exercise session with the kinesiologist we explain the importance of 3-5 sessions of aerobic exercise per week (150 minutes). They visit the cardiac rehab gym 2x/week so they are expected to do some walking or other activities at home. |
|       | <b>Resistance Training - benefits and safety</b>                                                                                                                | Section #2<br>Chapter #12<br>Page 92                                       | Patients can either start a prescribed weight training program on week 4 or 6 depending on their medical condition.<br>We also go over benefits, safety and different types of weight training exercises during week 3 of the education sessions.                              |

|                  |                                                                                               |                                                                            |                                                                                                                                                                                                                                                                                                                                                 |
|------------------|-----------------------------------------------------------------------------------------------|----------------------------------------------------------------------------|-------------------------------------------------------------------------------------------------------------------------------------------------------------------------------------------------------------------------------------------------------------------------------------------------------------------------------------------------|
|                  | <b>How Much Physical Activity is Good For You?</b>                                            | Section #3<br>Chapter #19<br>Page 151                                      | During a patients first one on one exercise session with the kinesiologist we explain the importance of 3-5 sessions of aerobic exercise per week (150 minutes). They visit the cardiac rehab gym 2x/week so they are expected to do some walking or other activities at home.                                                                  |
|                  | <b>Exercise and Weather</b> ( <i>hot or cold depending on season</i> )                        | Section #1<br>Chapter #6 (page 33 for cold) & Chapter #7 (page 41 for hot) | This can also be discussed during a patient's first exercise session, especially if they start the program during the summer months.                                                                                                                                                                                                            |
|                  | <b>Progress Your Exercise Program</b>                                                         | Section #3<br>Chapter #20<br>Page 156                                      | We explain how to progress an exercise program during the education session. At the end of each patient's 12 week program, they are scheduled for a follow up with the kinesiologist where we go over this with them again. We also talk to them about continuing in our maintenance program or help them plan a transition to another program. |
| 3 & 7            | <b>Goal Setting &amp; Action Planning</b>                                                     | Section #2<br>Chapter #11<br>Page 79                                       | During their first exercise session, patients are asked to set a goal and discuss 2 actions that will be undertaken in order to achieve said goal.                                                                                                                                                                                              |
| 4                | <b>Cardiac Medicines</b>                                                                      | Section #1<br>Chapter #9<br>Page 63                                        | Because our education classes alternate between English and French, patient's don't end up doing this class all on the same week.                                                                                                                                                                                                               |
| 5                | <b>Your Psychosocial Risks – Part 1 &amp; 2</b>                                               | Section #2<br>Chapter #17<br>Page 134                                      | In addition to having a one on one meeting with our psychologist, patients attend a stress management session which is held during week 5 of our education sessions.                                                                                                                                                                            |
| Appoint<br>ments | <b>Nutrition – Reading Food Labels</b><br><b>Note – there will be no exercise on this day</b> | Section #2<br>Chapter # 15<br>Page 118                                     | Patients are also given the opportunity to sign up for a grocery tour given by a dietician in the community. These sessions alternate between French and English; therefore aren't attended by patients all on the same week of their program.                                                                                                  |

|        |                                           |                                       |                                                                                                                                                                                                                                                                                                 |
|--------|-------------------------------------------|---------------------------------------|-------------------------------------------------------------------------------------------------------------------------------------------------------------------------------------------------------------------------------------------------------------------------------------------------|
| 10-12* | <b>Relapse Planning</b>                   | Section #3<br>Chapter #21<br>Page 164 | The patients are scheduled for a 3 month program follow up with the kinesiologist where they will be given information to continue the maintenance program or opt to continue on their own. They will be informed that a 6 month post program follow up will also be scheduled at a later date. |
| 12*    | <b>Graduation (Life after Graduation)</b> | Section #3<br>Chapter 22<br>Page 168  | We do not have a formal graduation as all of our patients start on different days/weeks. They will be given information on continuing in our maintenance program or help with transitioning to another program of their choice.                                                                 |

\*week number related to exercise program.

### Site 3: Education Program Schedule with the Cardiac College at PREV Program - Quebec

Education at PREV was delivered as followed: 12 education sections (once per week) with 20 minutes of duration per session. The content of these sessions followed the 5 pillars of Cardiac College (treating heart disease, getting active, healthy eating, emotional wellbeing, and taking control). A multidisciplinary team of healthcare providers delivered the education through lectures and using the patient guide in French.

| <b>Week</b> | <b>Education Topic</b>                           | <b>Guide Section &amp; Chapter</b>  | <b>Comments</b>                                     |
|-------------|--------------------------------------------------|-------------------------------------|-----------------------------------------------------|
| Pre-CR      | <b>Orientation to Your Cardiac Rehab Program</b> | Section #1<br>Chapter #1<br>Page 1  | We talk about this topic during initial assessment. |
| 1           | <b>Your Heart and Heart Disease</b>              | Section #1<br>Chapter #8<br>Page 50 |                                                     |

|   |                                                                        |                                                                                                                                 |                                                                                                             |
|---|------------------------------------------------------------------------|---------------------------------------------------------------------------------------------------------------------------------|-------------------------------------------------------------------------------------------------------------|
|   | <b>Safe Exercise</b> (includes angina education)                       | Section #1<br>Chapter # 2<br>Page 6<br><br>Angina:<br>Chapter #4<br>Page 23<br><br>Irregular Heartbeats<br>Chapter #5<br>Page28 | The part about angina will be delivered at first week<br><br>The rest of the content is delivered at week 8 |
| 2 | <b>Controlling Your Risk Factors</b>                                   | Section #2<br>Chapter #10<br>Page 72                                                                                            | We also talk about exercise's benefits                                                                      |
| 3 | <b>Nutrition – Benefits of Fibre and Plant Food</b>                    | Section #2<br>Chapter #14<br>Page 112                                                                                           |                                                                                                             |
| 4 | <b>Vascular Disease for patients with stroke*</b>                      |                                                                                                                                 | *Not relevant to the participants of our study.                                                             |
| 5 | <b>Your Psychosocial Risks – Part 1 &amp; 2</b>                        | Section #2<br>Chapter #17<br>Page 134                                                                                           |                                                                                                             |
| 6 | <b>Goal Setting &amp; Action Planning</b>                              | Section #2<br>Chapter #11<br>Page 79                                                                                            |                                                                                                             |
|   | <b>Relapse Planning</b>                                                | Section #3<br>Chapter #21<br>Page 164                                                                                           |                                                                                                             |
| 7 | <b>Cardiac Medicines</b>                                               | Section #1<br>Chapter #9<br>Page 63                                                                                             |                                                                                                             |
| 8 | <b>Exercise and Weather</b> ( <i>hot or cold depending on season</i> ) | Section #1<br>Chapter #6 (page 33 for cold) & Chapter #7 (page 41 for hot)                                                      |                                                                                                             |



|    |                                                                                                                                                                 |                                                                            |                                                |
|----|-----------------------------------------------------------------------------------------------------------------------------------------------------------------|----------------------------------------------------------------------------|------------------------------------------------|
|    | <b>Exercise and Cold Weather</b> <i>(this can be moved later to an open spot if the time of year is not appropriate for the topic or change to hot weather)</i> | Section #1<br>Chapter #6 (page 33 for cold) & Chapter #7 (page 41 for hot) |                                                |
|    | <b>Aerobic Exercise</b>                                                                                                                                         | Section #1<br>Chapter #2<br>Page 17                                        |                                                |
|    | <b>Exercise and Cold Weather</b> <i>(this can be moved later to an open spot if the time of year is not appropriate for the topic or change to hot weather)</i> | Section #1<br>Chapter #6 (page 33 for cold) & Chapter #7 (page 41 for hot) |                                                |
|    | <b>Resistance Training Part 1 &amp; 2- benefits and safety</b>                                                                                                  | Section #2<br>Chapter #12<br>Page 92                                       |                                                |
| 9  | <b>How Much Physical Activity is Good For You?</b>                                                                                                              | Section #3<br>Chapter #19<br>Page 151                                      |                                                |
|    | <b>Progress Your Exercise Program</b>                                                                                                                           | Section #3<br>Chapter #20<br>Page 156                                      |                                                |
|    | <b>Graduation</b>                                                                                                                                               | Section #3<br>Chapter 22<br>Page 168                                       | We talk about activities offered in community. |
| 10 | <b>Nutrition – Fats, Cholesterol and your Diet + Resistance Training Part 3</b>                                                                                 | Section #2<br>Chapter #13<br>Page 100                                      |                                                |
|    | <b>Nutrition – Sodium &amp; Blood Pressure</b>                                                                                                                  | Section #2<br>Chapter #16<br>Page 126                                      |                                                |

|    |                                                                                               |                                        |                                            |
|----|-----------------------------------------------------------------------------------------------|----------------------------------------|--------------------------------------------|
| 11 | <b>Nutrition – Reading Food Labels</b><br><b>Note – there will be no exercise on this day</b> | Section #2<br>Chapter # 15<br>Page 118 |                                            |
| 12 | <b>Final class</b>                                                                            | -                                      | Education about demystifying false beliefs |

Supplemental Table S2: Participants' sociodemographic and clinical characteristics at pre-test by retention status

| Characteristic                |                                 | Retained<br>(n=162;<br>64.3%) | Lost to<br>follow-up<br>(n=90) | Overall<br>(n=252) |
|-------------------------------|---------------------------------|-------------------------------|--------------------------------|--------------------|
| <b>Sociodemographic</b>       |                                 |                               |                                |                    |
| <b>Age (mean±SD)</b>          |                                 | 64.39±9.16                    | 62.37±9.65                     | 64.59±9.67         |
| <b>Sex n (%)</b>              | Male                            | 113 (70.2)                    | 45 (67.2)                      | 159 (69.4)         |
|                               | Female                          | 48 (29.8)                     | 22 (32.8)                      | 70 (30.6)          |
| <b>Ethnicity† n (%)</b>       | Caucasian                       | 129 (86.6)                    | 53 (79.1)                      | 182 (84.3)         |
|                               | Others                          | 20 (13.4)                     | 14 (21.9)                      | 12 (5.1)           |
| <b>Education level† n (%)</b> | Less than high school           | 15 (9.4)                      | 5 (6.9)                        | 20 (8.6)           |
|                               | High School                     | 44 (27.5)                     | 23 (31.9)                      | 67 (28.9)          |
|                               | Trades certificate              | 21 (13.1)                     | 11 (15.3)                      | 32 (13.8)          |
|                               | College or Diploma              | 36 (22.5)                     | 19 (26.4)                      | 55 (23.7)          |
|                               | University                      | 44 (27.5)                     | 14 (19.4)                      | 23 (25.0)          |
| <b>Family income† n (%)</b>   | Under \$10,000 per year         | 4 (2.6)                       | 4 (5.9)                        | 8 (3.7)            |
|                               | Between \$10,001 and \$50,000   | 71 (47.0)                     | 29 (42.6)                      | 100 (45.7)         |
|                               | Between \$50,001 and \$100,000  | 48 (31.8)                     | 22 (32.4)                      | 70 (32)            |
|                               | Between \$100,001 and \$150,000 | 18 (11.9)                     | 7 (10.3)                       | 25 (11.4)          |
|                               | Above \$150,001                 | 10 (6.6)                      | 6 (8.8)                        | 16 (7.3)           |
| <b>Clinical, n (% yes) ‡</b>  |                                 |                               |                                |                    |
| <b>MI</b>                     |                                 | 70 (43.8)                     | 24 (35.8)                      | 95 (41.7)          |
| <b>PCI</b>                    |                                 | 98 (61.6)                     | 34 (50.7)                      | 132 (58.1)         |
| <b>CABG</b>                   |                                 | 38 (23.9)                     | 14 (20.9)                      | 52 (22.9)          |
| <b>Angina</b>                 |                                 | 50 (31.3)                     | 14 (20.9)                      | 65 (28.5)          |

|                                       |                  |            |           |            |
|---------------------------------------|------------------|------------|-----------|------------|
| <b>CHF</b>                            |                  | 16 (10.0)  | 7 (10.4)  | 23 (10.1)  |
| <b>Risk factors and comorbidities</b> | Hypertension     | 123 (76.4) | 44 (65.7) | 168 (73.4) |
|                                       | Dyslipidemia     | 117 (72.7) | 39 (58.2) | 157 (68.6) |
|                                       | Diabetes Type II | 27 (16.8)  | 23 (34.3) | 50 (21.8)  |
|                                       | Obesity          | 62 (38.5)  | 21 (31.3) | 84 (36.7)  |
|                                       | Smoking          | 16 (9.9)   | 8 (11.9)  | 24 (10.5)  |
|                                       | Sleep apnea      | 10 (6.2)   | 8 (11.9)  | 18 (7.9)   |
|                                       | Alcohol          | 11 (6.8)   | 2 (3.0)   | 13 (5.7)   |
|                                       | VHD              | 6 (4.1)    | 1 (2.6)   | 7 (3.3)    |
|                                       | Depression       | 3 (1.9)    | 2 (3.0)   | 5 (2.2)    |

---

Note = valid percentages are reported.

CABG indicates coronary artery bypass grafting; CHF chronic heart failure; MI myocardial infarction; PCI percutaneous coronary intervention; SD standard deviation; VHD valvular heart disease.

\* Analysis of variance \*p<.05

†Self-reported.

‡Extracted from electronic patients records.
